# Supplementary material for: Unveiling diabetic nephropathy: a novel diagnostic model through single-cell sequencing and co-expression analysis
Source: publisher site journal article supplement (doi:10.18632/aging.205982), 2024-07-03
Supplement: Supplementary file [file aging-v16-205982-supplementary-material-SD1.pdf]

## SUPPLEMENTARY TABLES

**Supplementary Table 1. Disulfidptosis-related genes.**

| <b>Disulfidptosis</b> |
|-----------------------|
| FLNA                  |
| FLNB                  |
| MYH9                  |
| TLN1                  |
| ACTB                  |
| MYL6                  |
| MYH10                 |
| CAPZB                 |
| DSTN                  |
| IQGAP1                |
| ACTN4                 |
| PDLIM1                |
| CD2AP                 |
| INF2                  |
| SLC7A11               |
| SLC3A2                |
| RPN1                  |
| NCKAP1                |
| NUBPL                 |
| NDUFA11               |
| LRPPRC                |
| OXSM                  |
| NDUFS1                |
| GYS1                  |

**Supplementary Table 2. PCR primer sequence.**

|         |         | <b>The primer sequence</b> |
|---------|---------|----------------------------|
| VEGFA   | Forward | ACAACAAATGTGAATGCAGACCA    |
|         | Reverse | GAGGCTCCAGGGCATTAGAC       |
| MAGI2   | Forward | CCAGGTTTCCGAGAAAAACCA      |
|         | Reverse | CTCATCAGGCTCGTCTCCAC       |
| THSD7A  | Forward | GGAGTGGTGTGAAGGTTTCGT      |
|         | Reverse | CCTCATAACCTGTGCCTGG        |
| ANKRD28 | Forward | TCACAGAACTGGCATGAACCT      |
|         | Reverse | GCACCAGTGATGGCAGAGAT       |
